# Supplementary material for: Collaborative care for comorbid depression and diabetes: a systematic review and meta-analysis
Source: HighWire-hosted journal article supplement (doi:10.1136/bmjopen-2013-004706), 2014-04-01

**Appendix page 6: Funnel plot assessing symmetry of 7 RCTs on effectiveness of collaborative care for improving HbA1c outcome.**

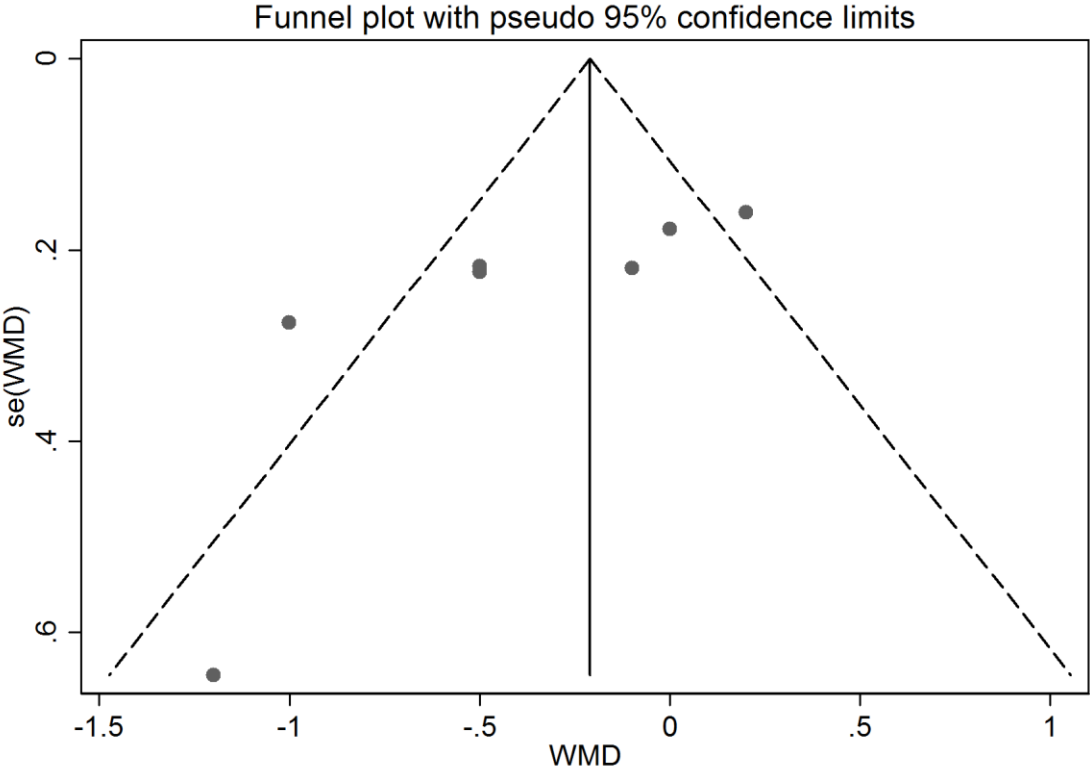

Supplement: bmjopen-2013-004706supp_appendix-Page6.pdf [file bmjopen-2013-004706supp_appendix-Page6.pdf]
